# Supplementary material for: An epithelial microRNA upregulates airway IL-25 and TSLP expression in type 2-high asthma via targeting CD39-extracellular ATP axis
Source: bioRxiv or medRxiv preprint supplement (doi:10.1101/2020.09.07.20188987), 2020-12-08
Supplement: Supplementary file [file 2020.09.07.20188987-1.pdf]

**Online Data Supplement:**

**An epithelial microRNA upregulates airway IL-25 and TSLP expression in type 2-high asthma via targeting CD39-extracellular ATP axis**

**Kan Zhang<sup>1,2</sup>, Yuchen Feng<sup>1,2</sup>, Yuxia Liang<sup>1,2</sup>, Wenliang Wu<sup>1,2</sup>, Chenli Chang<sup>1,2</sup>,**

**Dian Chen<sup>1,2</sup>, Shengchong Chen<sup>1,2</sup>, Lingling Yi<sup>1,2</sup>, Guohua Zhen<sup>1,2</sup>**

<sup>1</sup>Division of Pulmonary and Critical Care Medicine, Department of Internal Medicine, Tongji Hospital, Tongji Medical College, Huazhong University of Science and Technology, Wuhan, China; <sup>2</sup>Key Laboratory of Respiratory Diseases, National Health Commission of People's Republic of China, and National Clinical Research Center for Respiratory Diseases, Wuhan, China.

**Supplementary Table. Primers for quantitative PCR**

| Gene            | Species | Type    | Sequence                |
|-----------------|---------|---------|-------------------------|
| <i>β-actin</i>  | Human   | Forward | GCAAGCAGGACTATGACGAG    |
|                 |         | Reverse | CAAATAAAGCCATGCCAATC    |
| <i>CD39</i>     | Human   | Forward | ACTATCGAGTCCCCAGATAATGC |
|                 |         | Reverse | CCTGATCCTTCCCATAGCACAA  |
| <i>CLCA1</i>    | Human   | Forward | ATGGCTATGAAGGCATTGTCTG  |
|                 |         | Reverse | TGGCACATTGGGGTCTGATTG   |
| <i>GAPDH</i>    | Human   | Forward | AAGGTGAAGGTCGGAGTCAAC   |
|                 |         | Reverse | GGGGTCATTGATGGCAACAATA  |
| <i>POSTN</i>    | Human   | Forward | GACCGTGTGCTTACACAAATTG  |
|                 |         | Reverse | AAGTGACCGTCTCTTCCAAGG   |
| <i>SERPINB2</i> | Human   | Forward | TCCTGGGTCAAGACTCAAACC   |
|                 |         | Reverse | CATCCTGGTATCCCCATCTACA  |
| <i>β-actin</i>  | Mouse   | Forward | GGCTGTATTCCCCTCCATCG    |
|                 |         | Reverse | CCAGTTGGTAACAATGCCATGT  |
| <i>Gapdh</i>    | Mouse   | Forward | TGGCCTTCCGTGTTCTTAC     |
|                 |         | Reverse | GAGTTGCTGTTGAAGTCGCA    |
| <i>Cd39</i>     | Mouse   | Forward | AGATGAAATCGGTGCGTACCT   |
|                 |         | Reverse | GAGTCTGGTGATGCTTGGATG   |

## Supplementary Figure and Figure Legend:

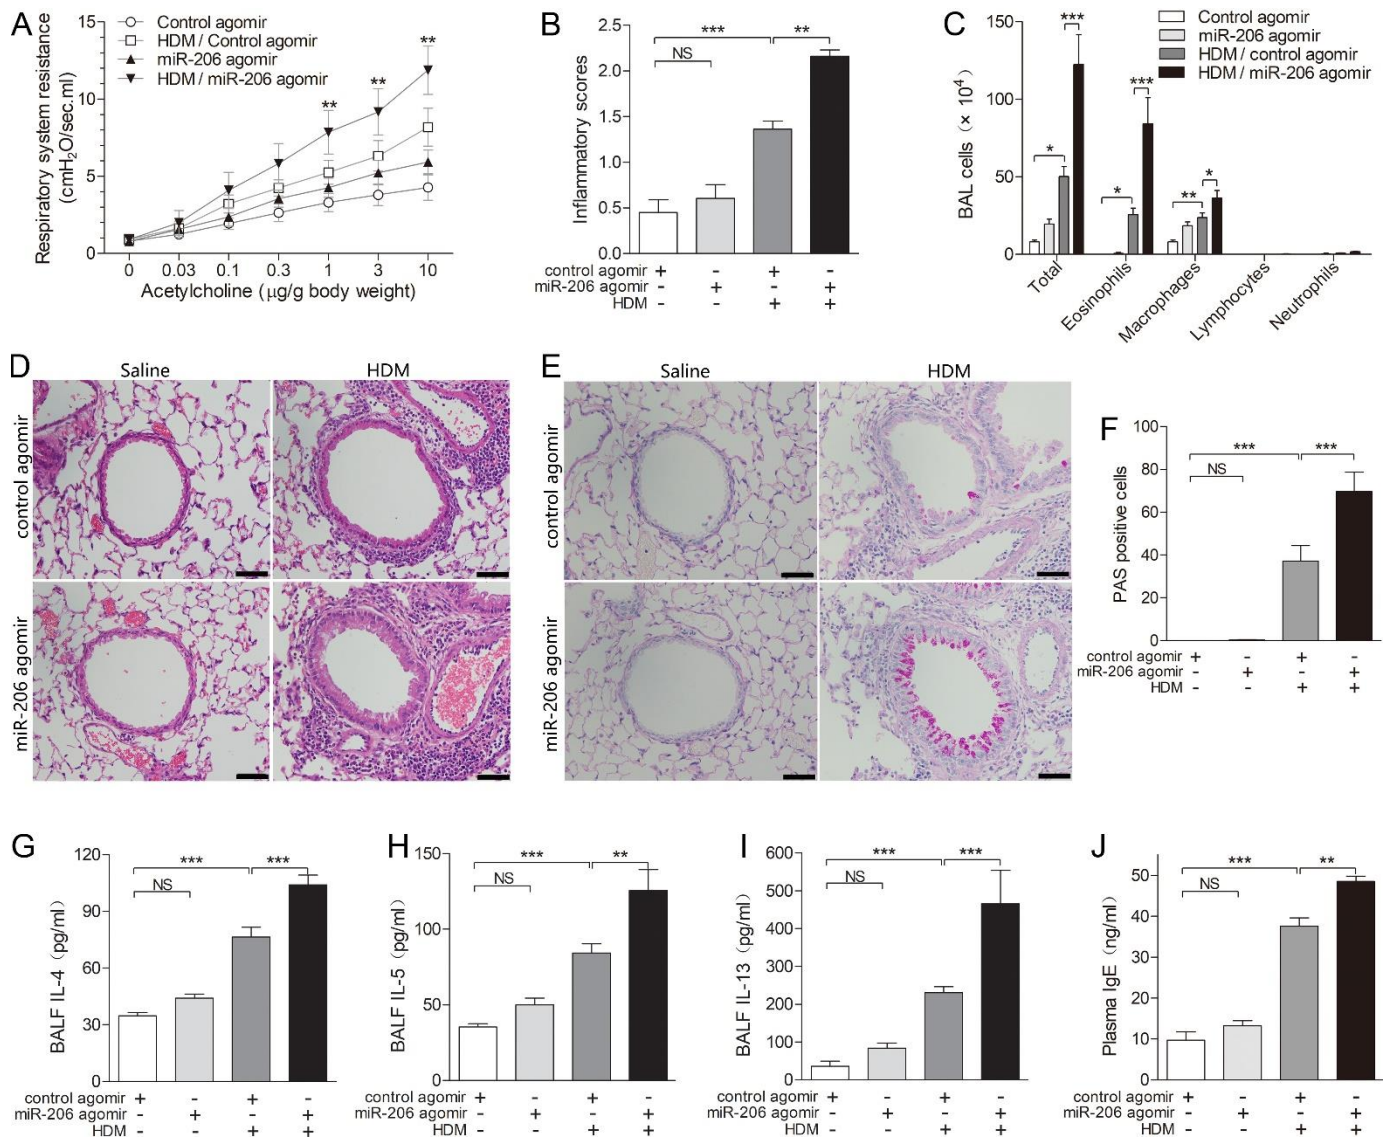

**Supplementary Figure. Overexpression of airway miR-206 expression aggravates HDM-induced AHR, airway inflammation, mucus overproduction and type 2 response in mice.** (A) Respiratory resistance in response to different concentration of intravenous acetylcholine at 24 h after the last HDM or saline challenge in mice intranasally administered with control or miR-206 agomir. (B) Inflammatory scores of lung sections from mice intranasally administered with control or miR-206 agomir and

challenged with HDM or saline were calculated as described in Methods. (C) Counts for macrophages, eosinophils, lymphocytes and neutrophils in BALF. (D) H&E staining of representative lung sections. (E) PAS staining for mucus in representative lung sections. (F) The numbers of PAS-staining-positive cells were counted in four random fields for each lung section at  $\times 200$  magnification. (G-I) The protein levels of IL-4 (G), IL-5 (H), IL-13 (I) in BALF were determined by ELISA. (J) Plasma IgE levels in peripheral blood were determined by ELISA.  $n = 6-10$  mice per group combined from 2 experiments. Data are mean  $\pm$  SD. \* $P < 0.05$ ; \*\* $P < 0.01$ ; \*\*\* $P < 0.001$  (one-way ANOVA with Bonferroni's post hoc test). Scale bar = 50  $\mu\text{m}$ .
